# Supplementary material for: Positively Selected Sites in Cetacean Myoglobins Contribute to Protein Stability
Source: PubMed Central journal article supplement (PMC3591298; doi:10.1371/journal.pcbi.1002929), 2013-03-07
Supplement: pcbi.1002929.s001.pdf [file pcbi.1002929.s001.pdf]

**Text S1**

**Positively selected sites in cetacean myoglobins contribute to protein Stability**

Pouria Dasmeh<sup>1,2</sup>, Adrian W.R Serohijos<sup>2</sup>, Kasper P. Kepp<sup>1\*</sup>, Eugene I. Shakhnovich<sup>2\*</sup>

<sup>1</sup>*Technical University of Denmark, DTU Chemistry, DK 2800 Kongens Lyngby, Denmark.*

<sup>2</sup>*Department of Chemistry and Chemical Biology, Harvard University, Cambridge, MA USA 02139.*

*\*Correspondence:*

E.I.S. ([shakhnovich@chemistry.harvard.edu](mailto:shakhnovich@chemistry.harvard.edu))

K.P.K. ([kpj@kemi.dtu.dk](mailto:kpj@kemi.dtu.dk))

**Table S1 Experimental and computed FoldX  $\Delta\Delta G$  for a range of Mb mutations.** The FoldX results (last two columns) are reported using two PDB structures: 1MBO and 1U7S.

| Nr | Reference | Mutation        | $\Delta\Delta G_{\text{experimental}}$<br>(unfolding) | pH  | T  | FoldX+<br>Repaired+1MBO<br>(kcal/mol) [1] | FoldX+<br>Repaired+1u7s<br>(kcal/mol) [2] |
|----|-----------|-----------------|-------------------------------------------------------|-----|----|-------------------------------------------|-------------------------------------------|
| 1  | [3]       | WT <sup>a</sup> | 0                                                     | 6   | 25 | 0                                         | 0                                         |
| 2  | [3]       | I28A            | 2.06                                                  | 6   | 25 | 0.74                                      | 1.08                                      |
| 3  | [3]       | L29A            | 0.39                                                  | 6   | 25 | 2.69                                      | 2.81                                      |
| 4  | [3]       | I30A            | 1.9                                                   | 6   | 25 | 1.6                                       | 2.32                                      |
| 5  | [3]       | L32A            | 2.04                                                  | 6   | 25 | 2.91                                      | 2.81                                      |
| 6  | [4]       | A130L           | 2.3                                                   | 7.5 | 0  | 4.29                                      | 2.11                                      |
| 7  | [4]       | A130K           | 3.7                                                   | 7.5 | 0  | 2.55                                      | 4.43                                      |
| 8  | [4]       | F123T           | 3.5                                                   | 7.5 | 0  | 4.11                                      | 4.75                                      |
| 9  | [5]       | H24V            | 0.52                                                  | 7   | 0  | 0.14                                      | -1.23                                     |
| 10 | [5]       | H36Q            | 1.3                                                   | 7   | 0  | 0.54                                      | 0.91                                      |
| 11 | [5]       | H48Q            | 0.62                                                  | 7   | 0  | -0.29                                     | -0.42                                     |
| 12 | [5]       | H64Q            | 0.45                                                  | 7   | 0  | -0.29                                     | -0.52                                     |
| 13 | [5]       | H82Q            | 0.05                                                  | 7   | 0  | 2.24                                      | 1.34                                      |
| 14 | [5]       | H93G            | -0.04                                                 | 7   | 0  | 2.07                                      | 2.12                                      |
| 15 | [5]       | H97Q            | 0.11                                                  | 7   | 0  | -0.23                                     | -0.26                                     |
| 16 | [5]       | H113Q           | 0.26                                                  | 7   | 0  | 0.14                                      | -0.48                                     |
| 17 | [5]       | H119F           | 0.68                                                  | 7   | 0  | -0.25                                     | -0.5                                      |

a: Experimental  $\Delta\Delta G$  values for the mutants are calculated from  $\Delta G(\text{mutant}) - \Delta G(\text{WT})$  where  $\Delta G(\text{WT})$  is the respective WT free energy of unfolding for each group.

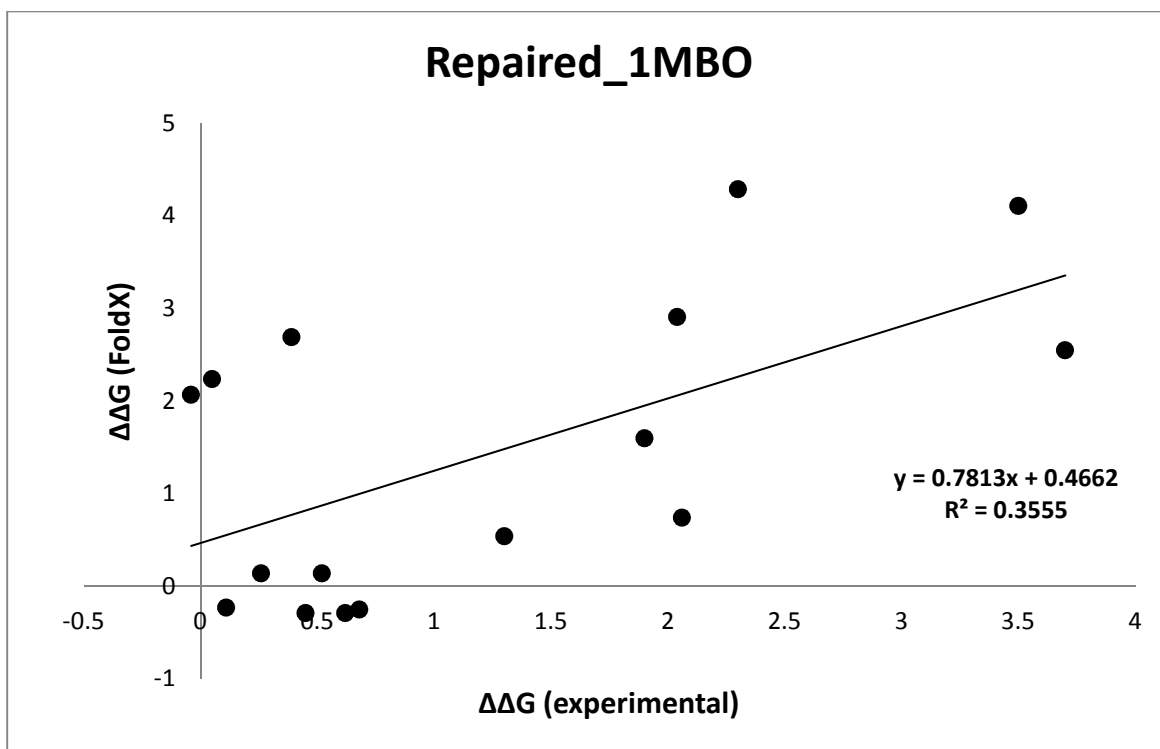

**Figure S1**  $\Delta\Delta G$  values predicted by FoldX versus experimental  $\Delta\Delta G$ s (kcal/mol) for the validation set (pdb=1MBO).

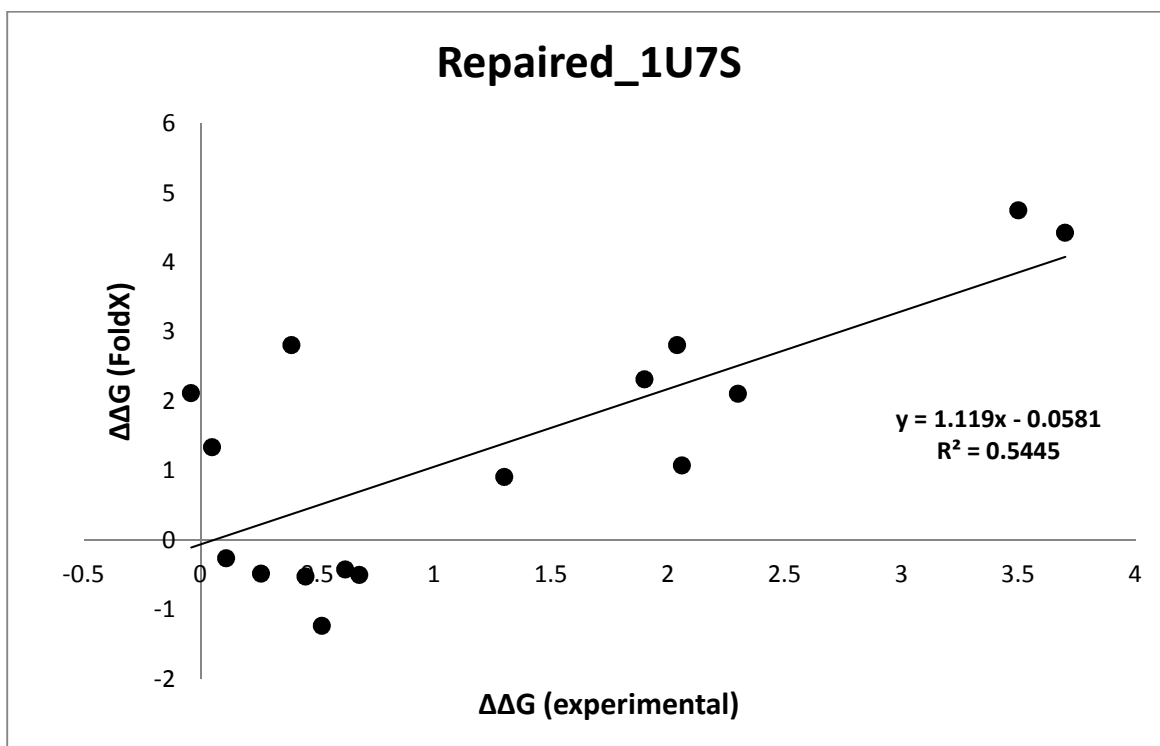

**Figure S2**  $\Delta\Delta G$  values predicted by FoldX versus experimental  $\Delta\Delta G$ s (kcal/mol) for the validation set (pdb=1U7S).

**Table S2 FoldX calculations for all mutations in the Cetacean clade using PDB structure 1U7S.** Mutations in the sites detected to be under positive selection are shown in grey.

| <b>Mutation</b> | <b><math>\Delta\Delta G</math></b> | <b>Mutation</b> | <b><math>\Delta\Delta G</math></b> |
|-----------------|------------------------------------|-----------------|------------------------------------|
| V1G             | -0.444                             | N66V            | -1.074                             |
| G1V             | 0.444                              | N66H            | -0.444                             |
| S3T             | 0.988                              | N66I            | -1.696                             |
| D4E             | 0.010                              | G74A            | -1.008                             |
| G5A             | -0.722                             | E83D            | 0.282                              |
| Q8H             | 0.208                              | D83E            | -0.282                             |
| N12H            | 0.240                              | V101I           | -1.446                             |
| V13I            | -0.550                             | E109D           | 0.426                              |
| G15A            | -0.230                             | K118R           | -0.670                             |
| A15G            | 0.230                              | R118K           | 0.670                              |
| V21I            | -0.678                             | G121A           | 0.038                              |
| V21L            | -1.224                             | G121S           | -1.032                             |
| A22S            | 0.556                              | D122E           | 0.208                              |
| E27D            | -1.518                             | G129A           | -0.670                             |
| D27E            | 1.518                              | A129G           | 0.670                              |
| V28I            | -1.098                             | S132N           | -0.007                             |
| I28V            | 1.098                              | N132S           | 0.007                              |
| R31S            | 0.404                              | N132T           | 0.530                              |
| G35S            | -0.142                             | N140K           | -0.090                             |
| S35H            | -0.636                             | M142I           | 0.212                              |
| K45R            | -0.142                             | A144T           | 1.080                              |
| T51S            | 0.334                              | F151Y           | 0.962                              |
| E54D            | -0.352                             | Q152H           | 0.504                              |

Probability of stabilization being conditional on the positive selection can be calculated as:

$$\Pr(\Delta\Delta G < 0 | \omega > 1) = \frac{\Pr(\omega > 1 | \Delta\Delta G < 0) \Pr(\Delta\Delta G < 0)}{\Pr(\omega > 1)} \quad (S1)$$

Overall, there are 63 different mutations in the whale, 26 mutations with  $\Delta\Delta G < 0$  and 17 mutations in the sites detected to be under positive selection with nine of them having  $\Delta\Delta G < 0$  (see Figure 3 in the main text). Equation S1 thus gives:

$$\Pr(\Delta\Delta G < 0 | \omega > 1) = \frac{\binom{9}{17} \binom{26}{63}}{\binom{17}{63}} = 0.8090$$

**Table S3 The best nucleotide and amino acid substitution models fitted to the data.**

| Model         | #Param | BIC    | AICc   | lnL     | Invariant | Gamma   |
|---------------|--------|--------|--------|---------|-----------|---------|
| Dayhoff+G     | 164    | 7024.6 | 5806.3 | -2737   | n/a       | 0.49985 |
| Dayhoff+G+I   | 165    | 7032.9 | 5807.1 | -2736.4 | 0.136066  | 0.67094 |
| JTT+G         | 164    | 7040.8 | 5822.4 | -2745.1 | n/a       | 0.47808 |
| JTT+G+I       | 165    | 7049.4 | 5823.6 | -2744.6 | 0.145221  | 0.6543  |
| WAG+G         | 164    | 7074.9 | 5856.5 | -2762.1 | n/a       | 0.45491 |
| WAG+G+I       | 165    | 7083.2 | 5857.4 | -2761.5 | 0.127089  | 0.58426 |
| rtREV+G       | 164    | 7106.2 | 5887.8 | -2777.8 | n/a       | 0.44271 |
| rtREV+G+I     | 165    | 7113.5 | 5887.8 | -2776.7 | 0.155407  | 0.60074 |
| Dayhoff+I     | 164    | 7163.5 | 5945.1 | -2806.4 | 0.363738  | n/a     |
| JTT+I         | 164    | 7182.6 | 5964.2 | -2816   | 0.374813  | n/a     |
| cpREV+G       | 164    | 7190.7 | 5972.4 | -2820   | n/a       | 0.38501 |
| cpREV+G+I     | 165    | 7196.4 | 5970.6 | -2818.1 | 0.209722  | 0.55634 |
| JTT+G+F       | 183    | 7200.3 | 5841.3 | -2735   | n/a       | 0.48313 |
| JTT+G+I+F     | 184    | 7208.6 | 5842.2 | -2734.4 | 0.124288  | 0.61995 |
| Dayhoff+G+F   | 183    | 7219.2 | 5860.3 | -2744.5 | n/a       | 0.49825 |
| Dayhoff+G+I+F | 184    | 7227.6 | 5861.2 | -2743.9 | 0.117732  | 0.63561 |
| WAG+I         | 164    | 7232.1 | 6013.7 | -2840.7 | 0.374551  | n/a     |
| rtREV+I       | 164    | 7269.4 | 6051   | -2859.4 | 0.374902  | n/a     |
| rtREV+G+F     | 183    | 7272   | 5913   | -2770.8 | n/a       | 0.44466 |
| rtREV+G+I+F   | 184    | 7279.2 | 5912.9 | -2769.7 | 0.149784  | 0.59206 |
| WAG+G+F       | 183    | 7287.9 | 5928.9 | -2778.8 | n/a       | 0.45483 |
| mtREV24+G     | 164    | 7289.7 | 6071.3 | -2869.5 | n/a       | 0.41432 |
| WAG+G+I+F     | 184    | 7296.1 | 5929.7 | -2778.2 | 0.120563  | 0.56934 |
| mtREV24+G+I   | 165    | 7296.8 | 6071   | -2868.3 | 0.146911  | 0.54439 |
| mtREV24+G+F   | 183    | 7314.9 | 5956   | -2792.3 | n/a       | 0.43429 |
| mtREV24+G+I+F | 184    | 7323.5 | 5957.2 | -2791.9 | 0.093653  | 0.5111  |
| Dayhoff       | 163    | 7328.7 | 6117.7 | -2893.7 | n/a       | n/a     |
| JTT+I+F       | 183    | 7347.1 | 5988.1 | -2808.4 | 0.368742  | n/a     |
| JTT           | 163    | 7361.5 | 6150.5 | -2910.1 | n/a       | n/a     |
| Dayhoff+I+F   | 183    | 7366.9 | 6007.9 | -2818.3 | 0.358554  | n/a     |
| cpREV+I       | 164    | 7373.1 | 6154.7 | -2911.2 | 0.395134  | n/a     |
| cpREV+G+F     | 183    | 7403.5 | 6044.5 | -2836.6 | n/a       | 0.39089 |
| cpREV+G+I+F   | 184    | 7406   | 6039.6 | -2833.1 | 0.266494  | 0.60489 |
| WAG           | 163    | 7408.5 | 6197.5 | -2933.6 | n/a       | n/a     |
| rtREV+I+F     | 183    | 7434   | 6075   | -2851.8 | 0.373158  | n/a     |
| WAG+I+F       | 183    | 7450.6 | 6091.7 | -2860.2 | 0.369681  | n/a     |
| rtREV         | 163    | 7465.3 | 6254.3 | -2962   | n/a       | n/a     |
| mtREV24+I     | 164    | 7496.3 | 6277.9 | -2972.8 | 0.362499  | n/a     |
| JTT+F         | 182    | 7508.4 | 6156.8 | -2893.8 | n/a       | n/a     |
| mtREV24+I+F   | 183    | 7509   | 6150.1 | -2889.4 | 0.357606  | n/a     |
| Dayhoff+F     | 182    | 7522   | 6170.5 | -2900.6 | n/a       | n/a     |
| cpREV         | 163    | 7546.3 | 6335.3 | -3002.5 | n/a       | n/a     |
| cpREV+I+F     | 183    | 7576.7 | 6217.7 | -2923.2 | 0.396104  | n/a     |
| WAG+F         | 182    | 7614.2 | 6262.6 | -2946.7 | n/a       | n/a     |
| rtREV+F       | 182    | 7618.3 | 6266.7 | -2948.7 | n/a       | n/a     |
| mtREV24+F     | 182    | 7675.5 | 6324   | -2977.3 | n/a       | n/a     |
| mtREV24       | 163    | 7723.3 | 6512.3 | -3091   | n/a       | n/a     |
| cpREV+F       | 182    | 7731.3 | 6379.7 | -3005.2 | n/a       | n/a     |

**Table S4 Results of amino acid substitution models for the whale clade.**

| Model         | #Param | BIC    | AICc   | lnL     |
|---------------|--------|--------|--------|---------|
| Dayhoff+G     | 18     | 1772.3 | 1676.6 | -820.08 |
| Dayhoff+G+I   | 19     | 1779.5 | 1678.6 | -820.04 |
| JTT+G         | 18     | 1784.5 | 1688.9 | -826.22 |
| JTT+G+I       | 19     | 1791.9 | 1690.9 | -826.22 |
| WAG+G         | 18     | 1796.7 | 1701   | -832.27 |
| rtREV+G       | 18     | 1799.9 | 1704.2 | -833.87 |
| WAG+G+I       | 19     | 1803.7 | 1702.7 | -832.12 |
| rtREV+G+I     | 19     | 1806.4 | 1705.5 | -833.49 |
| Dayhoff       | 17     | 1821.8 | 1731.4 | -848.5  |
| Dayhoff+I     | 18     | 1829.1 | 1733.4 | -848.5  |
| cpREV+G       | 18     | 1832.9 | 1737.3 | -850.41 |
| cpREV+I       | 18     | 1837   | 1741.4 | -852.47 |
| cpREV+G+I     | 19     | 1838.4 | 1737.4 | -849.47 |
| JTT           | 17     | 1847.7 | 1757.4 | -861.48 |
| JTT+I         | 18     | 1855.1 | 1759.4 | -861.48 |
| WAG           | 17     | 1864.5 | 1774.1 | -869.87 |
| Dayhoff+G+F   | 37     | 1868   | 1672.3 | -798.2  |
| WAG+I         | 18     | 1871.8 | 1776.2 | -869.87 |
| JTT+G+F       | 37     | 1873.7 | 1678   | -801.06 |
| Dayhoff+G+I+F | 38     | 1875.3 | 1674.4 | -798.2  |
| rtREV         | 17     | 1877.4 | 1787   | -876.3  |
| JTT+G+I+F     | 38     | 1881   | 1680.1 | -801.06 |
| rtREV+I       | 18     | 1884.7 | 1789.1 | -876.3  |
| mtREV24+G     | 18     | 1886.1 | 1790.5 | -877.01 |
| rtREV+G+F     | 37     | 1886.6 | 1690.9 | -807.53 |
| mtREV24+G+I   | 19     | 1890.8 | 1789.9 | -875.7  |
| rtREV+G+I+F   | 38     | 1893.7 | 1692.8 | -807.42 |
| mtREV24+G+F   | 37     | 1900.7 | 1705   | -814.58 |
| WAG+G+F       | 37     | 1901.7 | 1706   | -815.05 |
| mtREV24+G+I+F | 38     | 1902.7 | 1701.7 | -811.89 |
| WAG+G+I+F     | 38     | 1908.9 | 1708   | -815.02 |
| cpREV         | 17     | 1915.8 | 1825.4 | -895.5  |
| Dayhoff+F     | 36     | 1925.3 | 1734.8 | -830.54 |
| cpREV+G+F     | 37     | 1925.6 | 1729.9 | -827.02 |
| Dayhoff+I+F   | 37     | 1932.6 | 1736.9 | -830.54 |
| cpREV+G+I+F   | 38     | 1932.9 | 1732   | -827.02 |
| JTT+F         | 36     | 1937.1 | 1746.7 | -836.46 |
| JTT+I+F       | 37     | 1944.5 | 1748.8 | -836.45 |
| WAG+F         | 36     | 1968.8 | 1778.4 | -852.3  |
| WAG+I+F       | 37     | 1976.2 | 1780.5 | -852.3  |
| rtREV+F       | 36     | 1978.4 | 1787.9 | -857.08 |
| mtREV24       | 17     | 1979.5 | 1889.1 | -927.35 |
| mtREV24+F     | 36     | 1980.5 | 1790.1 | -858.16 |
| rtREV+I+F     | 37     | 1985.7 | 1790   | -857.08 |
| mtREV24+I     | 18     | 1986.8 | 1891.1 | -927.34 |
| mtREV24+I+F   | 37     | 1987.9 | 1792.2 | -858.16 |
| cpREV+F       | 36     | 1996.9 | 1806.5 | -866.34 |
| cpREV+I+F     | 37     | 2004.3 | 1808.6 | -866.34 |

**Table S5 Results of nucleotide substitution models for the whale clade.**

| Model    | #Param | BIC    | AICc   | lnL     | Invariant | Gamma   | R      |
|----------|--------|--------|--------|---------|-----------|---------|--------|
| T92+G+I  | 21     | 2821.1 | 2686   | -1321.9 | 0.581175  | 0.22705 | 1.4379 |
| T92+G    | 20     | 2833.5 | 2704.8 | -1332.3 | n/a       | 0.09193 | 1.0517 |
| K2+G+I   | 20     | 2834   | 2705.3 | -1332.5 | 0.603384  | 0.2703  | 1.3252 |
| HKY+G+I  | 23     | 2834.9 | 2686.9 | -1320.3 | 0.578942  | 0.22564 | 1.4735 |
| TN93+G+I | 24     | 2839.4 | 2685   | -1318.4 | 0.58886   | 0.22944 | 1.4997 |
| K2+G     | 19     | 2839.6 | 2717.3 | -1339.6 | n/a       | 0.09298 | 0.9933 |
| JC+G     | 18     | 2842.6 | 2726.7 | -1345.3 | n/a       | 0.09076 | 0.5    |
| JC+I     | 18     | 2843.8 | 2727.9 | -1345.9 | 0.788337  | n/a     | 0.5    |
| JC+G+I   | 19     | 2844.2 | 2721.9 | -1341.9 | 0.596368  | 0.27056 | 0.5    |
| HKY+G    | 22     | 2846.3 | 2704.7 | -1330.3 | n/a       | 0.09227 | 1.0712 |
| HKY+I    | 22     | 2848.2 | 2706.6 | -1331.2 | 0.791017  | n/a     | 1.0625 |
| TN93+G   | 23     | 2850.5 | 2702.5 | -1328.1 | n/a       | 0.10033 | 1.0612 |
| GTR+G+I  | 27     | 2875.6 | 2701.9 | -1323.8 | 0.613329  | 0.3932  | 1.1952 |
| GTR+G    | 26     | 2875.8 | 2708.5 | -1328.1 | n/a       | 0.10037 | 1.0594 |
| T92      | 19     | 2973.3 | 2851   | -1406.4 | n/a       | n/a     | 0.916  |
| K2       | 18     | 2974.2 | 2858.4 | -1411.1 | n/a       | n/a     | 0.9147 |
| JC       | 17     | 2977.7 | 2868.3 | -1417.1 | n/a       | n/a     | 0.5    |
| T92+I    | 20     | 2982.1 | 2853.4 | -1406.6 | 0.00001   | n/a     | 0.916  |
| K2+I     | 19     | 2982.7 | 2860.4 | -1411.1 | 0.00001   | n/a     | 0.9147 |
| HKY      | 21     | 2987.1 | 2851.9 | -1404.9 | n/a       | n/a     | 0.9134 |
| TN93     | 22     | 2992.5 | 2850.9 | -1403.4 | n/a       | n/a     | 0.9175 |
| TN93+I   | 23     | 2999.4 | 2851.5 | -1402.6 | 0.00001   | n/a     | 0.9173 |
| GTR      | 25     | 3016   | 2855.2 | -1402.5 | n/a       | n/a     | 0.9275 |
| GTR+I    | 26     | 3022.9 | 2855.7 | -1401.7 | 0.00001   | n/a     | 0.9275 |

**Table S6 Likelihood ratio tests for site models when branch lengths are estimated for each model rather than taking the ML-estimated branch lengths from the M0 model. LRT values are shown for M7 vs. M8 and M8 vs. M8fix.**

| <b>Clades</b>    | <b>Model</b>                              | <b>ln L</b> | <b>2Δl</b>              | <b>P value</b> | <b>Positively selected sites (BEB: P(<math>\omega &gt; 1</math>) &gt; 0.50)</b> |
|------------------|-------------------------------------------|-------------|-------------------------|----------------|---------------------------------------------------------------------------------|
| <b>Cetaceans</b> | <b>Site models (number of parameters)</b> |             |                         |                |                                                                                 |
|                  | M7                                        | -1215.04    |                         |                | -                                                                               |
|                  | M8                                        | -1211.16    | (M7 vs. M8)<br>7.76     | 0.0206         | 5, 22, 35, 51, 66,<br>121, 129                                                  |
|                  | M8fix                                     | -1214.71    | (M8fix vs<br>M8)<br>7.1 | 0.007          |                                                                                 |



## Scheme S1 Alignment for sperm whale, pig, bovine, dog, sheep, horse and human myoglobin (Mb) sequences.

CLUSTAL O(1.1.0) multiple sequence alignment

```

SP|sp|P02185|MYG_PHYMC|MYG_PHYMC MVLSDGEWQLVNLVWAKVEADVAGHGQDILIRLFKSHPETLEKFDKFKHLKTEAEMKASE 60
SP|sp|P02189|MYG_PIG|MYG_PIG  MGLSDGEWQLVNLVWAKVEADVAGHGQEVLRIRLFKHPETLEKFDKFKHLKSEDEMKASE 60
SP|sp|P02192|MYG_BOVIN|MYG_BOVIN MGLSDGEWQLVNLAWGKVEADVAGHGQEVLRIRLFTGHPETLEKFDKFKHLKTEAEMKASE 60
SP|sp|P02159|MYG_LYCPI|MYG_LYCPI MGLSDGEWQIVLNIWGVKVEDLAGHGQEVLRIRLFKNHPETLDKFDKFKHLKTEDEMKGSE 60
SP|sp|P02190|MYG_SHEEP|MYG_SHEEP MGLSDGEWQLVNLAWGKVEADVAGHGQEVLRIRLFTGHPETLEKFDKFKHLKTEAEMKASE 60
SP|sp|P68082|MYG_HORSE|MYG_HORSE MGLSDGEWQVNLVWAKVEADIAHGQEVLRIRLFTGHPETLEKFDKFKHLKTEAEMKASE 60
SP|sp|P02144|MYG_HUMAN|MYG_HUMAN MGLSDGEWQLVNLVWAKVEADIPGHGQEVLRIRLFKHPETLEKFDKFKHLKSEDEMKASE 60
      *.....* *...*.....*.....*.....*.....*.....*.....*.....*.....*
SP|sp|P02185|MYG_PHYMC|MYG_PHYMC DLKKHGNTVLTALGGILKKKGHHEAELKPLAQSHATKHKIPIKYLEFISEAIIHVLHSRH 120
SP|sp|P02189|MYG_PIG|MYG_PIG  DLKKHGNTVLTALGGILKKKGHHEAELTPLAQSHATKHKIPVKYLEFISEAIIQVLSKH 120
SP|sp|P02192|MYG_BOVIN|MYG_BOVIN DLKKHGNTVLTALGGILKKKGHHEAEVKHLAESHANKHKIPVKYLEFISDAIHHVLHAKH 120
SP|sp|P02159|MYG_LYCPI|MYG_LYCPI DLKKHGNTVLTALGGILKKKGHHEAELKPLAQSHATKHKIPVKYLEFISDAIIQVLSKH 120
SP|sp|P02190|MYG_SHEEP|MYG_SHEEP DLKKHGNTVLTALGGILKKKGHHEAEVKHLAESHANKHKIPVKYLEFISDAIHHVLHAKH 120
SP|sp|P68082|MYG_HORSE|MYG_HORSE DLKKHGTVLTALGGILKKKGHHEAELKPLAQSHATKHKIPIKYLEFISDAIHHVLHAKH 120
SP|sp|P02144|MYG_HUMAN|MYG_HUMAN DLKKHGATVLTALGGILKKKGHHEAEIKPLAQSHATKHKIPVKYLEFISECIQVLSKH 120
      ***** .....*****.....*.....*.....*.....*.....*.....*.....*.....*
SP|sp|P02185|MYG_PHYMC|MYG_PHYMC PGDFGADAQAMNKALELFRKDIAAKYKELGFQG 154
SP|sp|P02189|MYG_PIG|MYG_PIG  PGDFGADAQAMSKALELFRNDMAAKYKELGFQG 154
SP|sp|P02192|MYG_BOVIN|MYG_BOVIN PSDFGADAQAAMSKALELFRNDMAAQYKVLGFHG 154
SP|sp|P02159|MYG_LYCPI|MYG_LYCPI SGDFHADTEAAMKALELFRNDIAAKYKELGFQG 154
SP|sp|P02190|MYG_SHEEP|MYG_SHEEP PSDFGADAQAMSKALELFRNDMAAQYKVLGFQG 154
SP|sp|P68082|MYG_HORSE|MYG_HORSE PGDFGADAQAMTKALELFRNDIAAKYKELGFQG 154
SP|sp|P02144|MYG_HUMAN|MYG_HUMAN PGDFGADAQAMNKALELFRKDIAAKYKELGFQG 154
      **...*.....*.....*.....*.....*.....*.....*.....*.....*.....*
  
```

## Scheme S2 The most probable cetacean ancestor with the complete phylogenetic tree (Figure 1-B), primate-rodent truncated tree, and only the cetacean clade.

```

Truncated tree  MVLSDGEWQLVNLVWAKVEADVAGHGQDILIRLFKHPETLEKFDKFKHLKTEAEMKASE 60
Cetacean clade MVLSDAEWQLVNLVWAKVEADVAGHGQDILIRLFKHPETLEKFDKFKHLKTEAEMKASE 60
Complete tree  MVLSDGEWQLVNLVWAKVEADVAGHGQDILIRLFKHPETLEKFDKFKHLKTEAEMKASE 60
      **** ..*.*****.....*.....*.....*.....*.....*.....*.....*.....*
Truncated tree  DLKKHGNTVLTALGGILKKKGHHEAELKPLAQSHATKHKIPIKYLEFISEAIIHVLHSRH 120
Cetacean clade DLKKHGNTVLTALGGILKKKGHHEAELKPLAQSHATKHKIPIKYLEFISDAIHHVLHAKH 120
Complete tree  DLKKHGNTVLTALGGILKKKGHHEAELKPLAQSHATKHKIPIKYLEFISEAIIHVLHSRH 120
      ***** .....*****.....*.....*.....*.....*.....*.....*.....*.....*
Truncated tree  PGDFGADAQAAMNKALELFRKDIAAKYKELGFQG 154
Cetacean clade PGDFGADAQAAMNKALELFRKDIAAKYKELGFQG 154
Complete tree  PGDFGADAQAAMNKALELFRKDIAAKYKELGFQG 154
      ***** .....*****.....*.....*.....*.....*.....*.....*.....*.....*
  
```

## Evaluating the robustness of positive selection with the gene-tree rather organism-tree for cetacean Mbs

To evaluate the robustness of positive selection with the gene-tree rather the species-tree, we have used the Maximum Likelihood method based on the Dayhoff matrix based model to make the phylogeny as shown in Figure 3. The bootstrap consensus tree inferred from 1000 replicates is taken to represent the evolutionary history of the taxa analyzed. Branches corresponding to partitions reproduced in less than 50% bootstrap replicates are collapsed. The percentage of replicate trees in which the associated taxa clustered together in the bootstrap test (1000 replicates) are shown next to the branches. A discrete Gamma distribution was used to model evolutionary rate differences among sites (4 categories (+G, parameter = 0.6640)). The tree is drawn to scale, with branch lengths measured in the number of substitutions per site. The analysis involved 10 amino acid sequences. There were a total of 154 positions in the final dataset. Evolutionary analyses were conducted in MEGA5.

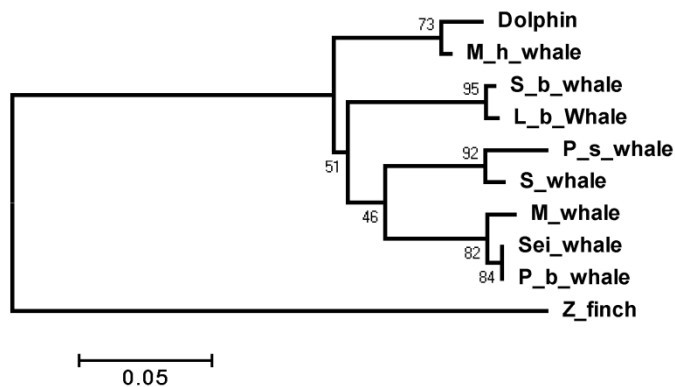

Figure 3. The gene-tree for the cetacean Mbs using the maximum likelihood estimation based on Dayhoff substitution model. Rate heterogeneity is allowed by using a discrete gamma distribution with four categories. The percentage of replicate trees in which the associated taxa clustered together in the bootstrap test (1000 replicates) are shown next to the branches.

Positive selection inferred in amino acid sites and judged by Likelihood ratio tests is also significant by using the gene-tree (see Table 1 below).

**Table S7 LRT values for M7 vs. M8 and M8 vs. M8fix for the gene tree of cetaceans rather than using the species tree.**

| Model | ln L     | 2Δl                       | P-value | Positively selected sites (BEB: $P(\omega > 1) > 0.50$ ) |
|-------|----------|---------------------------|---------|----------------------------------------------------------|
| M7    | -1399.00 |                           |         | ---                                                      |
| M8    | -1391.65 | (M7 vs. M8)<br>14.7       | 0.00064 | 5, 22, 35, 51, 66, 121, 129                              |
| M8fix | -1396.86 | (M8fix vs<br>M8)<br>10.42 | 0.0012  | ---                                                      |

**Table S8 Species name and accession number of Mb sequences used in this study.**

| <b>Rank</b> | <b>Name in the phylogeny<br/>(full common name)</b> | <b>Species name</b>         | <b>Accession<br/>number-<br/>Protein<br/>sequence<sup>a</sup></b> | <b>Accession<br/>number-<br/>Nucleotide<br/>sequence</b> |
|-------------|-----------------------------------------------------|-----------------------------|-------------------------------------------------------------------|----------------------------------------------------------|
| 1           | B_s_dolphin<br>(Black sea dolphin)                  | Delphinus<br>delphis        | P68276                                                            | NA                                                       |
| 2           | P_s_dolphin<br>(Pantropical spotted dolphin)        | Stenella<br>attenuata       | Q0KIY7                                                            | BAF03580 <sup>b</sup>                                    |
| 3           | A_bn_dolphin<br>(Atlantic bottle-nosed<br>dolphin)  | Tursiops<br>truncatus       | P68279                                                            | NA                                                       |
| 4           | H_porpoise (Harbor<br>porpoise)                     | Phocoenoides                | P68278                                                            | NA                                                       |
| 5           | D_porpoise (Dall's porpoise)                        | Phocoenoides<br>dalli dalli | P68277                                                            | NA                                                       |
| 6           | M_h_whale (Melon-headed<br>whale)                   | Peponocephala<br>electra    | Q0KIY3                                                            | BAF03584 <sup>b</sup>                                    |
| 7           | Lf_p_whale (Long-finned<br>pilot whale)             | Globicephala<br>melas       | P02174                                                            | NA                                                       |
| 8           | K_whale (Killer whale)                              | Orcinus orca                | P02173                                                            | NA                                                       |
| 9           | A_dolphin (Amazon<br>dolphin)                       | Inia geoffrensis            | P02181                                                            | NA                                                       |
| 10          | S_b_whale (Stejneger's<br>beaked whale)             | Mesoplodon<br>stejnegeri    | Q0KIY0                                                            | BAF03587 <sup>b</sup>                                    |
| 11          | H_b_whale (Hubb's beaked<br>whale)                  | Mesoplodon<br>carlhubbsi    | P02183                                                            | NA                                                       |
| 12          | L_b_whale (Longman's<br>beaked whale)               | Indopacetus<br>pacificus    | Q0KIY9                                                            | BAF03578 <sup>b</sup>                                    |
| 13          | G_b_whale (Goose-beaked<br>whale)                   | Ziphius<br>cavirostris      | P02182                                                            | NA                                                       |
| 14          | P_b_whale (Pigmy Bryde's<br>whale)                  | Balaenoptera<br>edeni       | Q0KIY2                                                            | BAF03585 <sup>b</sup>                                    |
| 15          | S_whale (Sperm whale)                               | Physeter<br>macrocephalus   | P02185                                                            | BAF03579 <sup>b</sup>                                    |
| 16          | P_s_whale (Pygmy sperm<br>whale)                    | Kogia<br>breviceps          | Q0KIY5                                                            | BAF03582 <sup>b</sup>                                    |
| 17          | D_s_whale (Dwarf sperm<br>whale)                    | Kogia sima                  | P02184                                                            | NA                                                       |
| 18          | Hu_whale (Humpback<br>whale)                        | Megaptera<br>novaeangliae   | P02178                                                            | NA                                                       |
| 19          | Fi_whale (Finback whale)                            | Balaenoptera<br>physalus    | P02180                                                            | NA                                                       |
| 20          | C_g_whale (California gray<br>whale)                | Eschrichtius<br>gibbosus    | P02177                                                            | NA                                                       |
| 21          | Sei_whale (Sei whale)                               | Balaenoptera<br>borealis    | Q0KIY1                                                            | BAF03586 <sup>b</sup>                                    |

NU=Not used, NA=Not Available, a: Taken from Uniprot database<sup>6</sup>, b: Take from EMBL database<sup>7</sup>, c: Taken from Ensembl genome browser<sup>8</sup>.

Continued Table S8.

| Rank | Name in the phylogeny (full common name) | Species name               | Accession number-Protein sequence | Accession number-Nucleotide sequence |
|------|------------------------------------------|----------------------------|-----------------------------------|--------------------------------------|
| 22   | C_m_whale (Common minke whale)           | Balaenoptera acutorostrata | P02179                            | BAF03583 <sup>b</sup>                |
| 23   | Bovine (Bovine)                          | Bos taurus                 | P02192                            | BAA00311 <sup>b</sup>                |
| 24   | A_bison (American bison)                 | Bison bison                | P86873                            | NA                                   |
| 25   | D_w_buffalo (Domestic water buffalo)     | Bubalus bubalis            | P84997                            | NA                                   |
| 26   | W_yak (Wild yak)                         | Bos mutus grunniens        | Q2MJN4                            | NA                                   |
| 27   | Sheep (Sheep)                            | Ovis aries                 | P02190                            | ABJ97274 <sup>b</sup>                |
| 28   | R_deer (Red deer)                        | Cervus elaphus             | P02191                            | NA                                   |
| 29   | Goat (Goat)                              | Capra hircus               | B7U9B5                            | NA                                   |
| 30   | Pig (Pig)                                | Sus scrofa                 | P02189                            | AAA31073 <sup>b</sup>                |
| 31   | P_zebera (Plains zebra)                  | Equus burchelli            | P68083                            | NA                                   |
| 32   | Horse (Horse)                            | Equus caballus             | P68082                            | NM_001164016.1 <sup>c</sup>          |
| 33   | E_badger                                 | Meles meles                | P02157                            | NA                                   |
| 34   | G_seal (Gray seal)                       | Halichoerus grypus         | P68081                            | NA                                   |
| 35   | H_seal (Harbor seal)                     | Phoca vitulina             | P68080                            | NA                                   |
| 36   | B_seal (Baikal seal)                     | Phoca sibirica             | P30562                            | NA                                   |
| 37   | Ca_sealion (California sealion)          | Zalophus californianus     | P02161                            | NA                                   |
| 38   | E_r_otter (European river otter)         | Lutra lutra                | P11343                            | NA                                   |
| 39   | Dog (Dog)                                | Canis familiaris           | P63113                            | NA                                   |
| 40   | Cat (Cat)                                | Felis catus                | NU                                | ENSFCAT00000010057 <sup>d</sup>      |
| 41   | A_w_dog (African wild dog)               | Lycaon pictus              | P02159                            | NA                                   |
| 42   | C_fox (Cape fox)                         | Vulpes chama               | P02160                            | NA                                   |
| 43   | B_e_folx (Bat-eared fox)                 | Otocyon megalotis          | P63114                            | NA                                   |
| 44   | Microbat (Microbat)                      | Corynorhinus townsendii    | NU                                | ENSMLUG00000013313 <sup>c</sup>      |
| 45   | E_f_bat (Egyptian fruit bat)             | Rousettus aegyptiacus      | P02163                            | NA                                   |

Continued Table S8.

| Rank | Name in the phylogeny (full common name) | Species name             | Accession number-Protein sequence | Accession number-Nucleotide sequence |
|------|------------------------------------------|--------------------------|-----------------------------------|--------------------------------------|
| 46   | G_s_rat (Guaira spiny rat)               | Proechimys guairae       | P04249                            | NA                                   |
| 47   | P_viscacha (Plains viscacha)             | Lagostomus maximus       | P04250                            | NA                                   |
| 48   | N-gundi (Northern gundi)                 | Ctenodactylus gundi      | P20856                            | NA                                   |
| 49   | E_beaver (Eurasian beaver)               | Castor fiber             | P14396                            | NA                                   |
| 50   | MBE_rat (Middle East blind mole rat)     | Spalax ehrenbergi        | P04248                            | NA                                   |
| 51   | Muskrat (Muskrat)                        | Ondatra zibethicus       | P32428                            | NA                                   |
| 52   | Rat (Rat)                                | Rattus norvegicus        | Q9QZ76                            | ENSDORG00000014500 <sup>c</sup>      |
| 53   | K_rat (Kangaroo rat)                     | Dipodomys                | NU                                | ENSDORG00000014500 <sup>c</sup>      |
| 54   | Ginea_pig (Ginea pig)                    | Cavia porcellus          | NU                                | ENSCPOG00000006864 <sup>c</sup>      |
| 55   | Mouse (Mouse)                            | Mus musculus             | P04247                            | ENSMUSG00000018893 <sup>c</sup>      |
| 56   | S_a_pika (Southern American pika)        | Ochotona princeps        | P02171                            | NA                                   |
| 57   | B_l_pika (Black-lipped pika)             | Ochotona curzoniae       | Q6PL31                            | NA                                   |
| 58   | Rabbit (Rabbit)                          | Oryctolagus cuniculus    | P02170                            | NA                                   |
| 59   | Chimpanzee (Chimpanzee)                  | Pan troglodytes          | P02145                            | ENSPTRG00000023553 <sup>c</sup>      |
| 60   | Human (Human)                            | Homo sapiens             | P02144                            | ENSG00000198125 <sup>c</sup>         |
| 61   | M_gorilla (Mountain gorilla)             | Gorilla gorilla beringei | P02147                            | ENSGGOG00000011478 <sup>c</sup>      |
| 62   | B_orangutan (Bornean orangutan)          | Pongo pygmaeus           | P02148                            | NA                                   |
| 63   | Siamang (Siamang)                        | Hylobates syndactylus    | P62735                            | NA                                   |
| 64   | A_gibbon (Agile gibbon)                  | Hylobates agilis         | P62734                            | ENSNLEG00000014375 <sup>c</sup>      |
| 65   | H_langur (Hanuman langur)                | Semnopithecus entellus   | P68085                            | NA                                   |
| 66   | R_guenon (Red guenon)                    | Erythrocebus patas       | P68086                            | NA                                   |
| 67   | C_e_macaque (Crab-eating macaque)        | Macaca fascicularis      | P02150                            | ENSMMUG00000005034 <sup>c</sup>      |
| 68   | O_baboon (Olive baboon)                  | Papio anubis             | P68084                            | NA                                   |

*Continued Table S8.*

| <b>Rank</b> | <b>Name in the phylogeny (full common name)</b> | <b>Species name</b>              | <b>Accession number-Protein sequence</b> | <b>Accession number-Nucleotide sequence</b> |
|-------------|-------------------------------------------------|----------------------------------|------------------------------------------|---------------------------------------------|
| 69          | B_w_monkey (Brown woolly monkey)                | Lagothrix lagotricha             | P02154                                   | NA                                          |
| 70          | N_monkey (Night monkey)                         | Aotus trivirgatus                | P02151                                   | NA                                          |
| 71          | Wte_marmoset (White-tufted-ear marmoset)        | Callithrix jacchus               | P02152                                   | ENSCJAG00000000506 <sup>c</sup>             |
| 72          | Cs_monkey (Common squirrel monkey)              | Saimiri sciureus                 | P02155                                   | NA                                          |
| 73          | B_c_capuchin (Brown-capped capuchin)            | Cebus apella                     | P02153                                   | NA                                          |
| 74          | G_galago (Greater galago)                       | Otolemur crassicaudatus          | P02168                                   | ENSOGAG000000005651 <sup>c</sup>            |
| 75          | S_ioris (Slow loris)                            | Nycticebus coucang               | P02167                                   | NA                                          |
| 76          | Potto (Potto)                                   | Perodicticus potto edwarsi       | P02166                                   | NA                                          |
| 77          | W_lemur (Weasel sportive lemur)                 | Lepilemur mustelinus             | P02169                                   | ENSMICG000000014107 <sup>c</sup>            |
| 78          | T_shrew (Tree shrew)                            | Tupaia glis                      | P02165                                   | ENSTBEG000000002813 <sup>c</sup>            |
| 79          | Aardvark (Aardvark)                             | Orycteropus afer                 | P02164                                   |                                             |
| 80          | In_elephant (Indian elephant)                   | Elephas maximus                  | P02186                                   | ENSLAFG000000023176 <sup>c</sup>            |
| 81          | A_elephant (African elephant)                   | Loxodonta africana               | P02187                                   | NA                                          |
| 82          | Hyrax (Hyrax)                                   | Procavia capensis                | NU                                       | ENSPCAG000000003717 <sup>c</sup>            |
| 83          | Na_opossum (North American opossum)             | Didelphis marsupialis virginiana | P02193                                   | NA                                          |
| 84          | R_Kangaroo (Red kangaroo)                       | Macropus rufus                   | P02194                                   | NA                                          |
| 85          | A_echidna (Australian echidna)                  | Tachyglossus aculeatus aculeatus | P02195                                   | NA                                          |

*Continued Table S8.*

| <b>Rank</b> | <b>Name in the phylogeny (full common name)</b> | <b>Species name</b>      | <b>Accession number-Protein sequence</b> | <b>Accession number-Nucleotide sequence</b> |
|-------------|-------------------------------------------------|--------------------------|------------------------------------------|---------------------------------------------|
| 86          | D_platypus (Duckbill platypus)                  | Ornithorhynchus anatinus | P02196                                   | ENSOANG00000010874 <sup>c</sup>             |
| 87          | We_hedgehog (Western european hedgehog)         | Erinaceus europaeus      | P02156                                   | ENSEEUG00000005138 <sup>c</sup>             |
| 88          | Z_finch (Zebra finch)                           | Taeniopygia guttata      | H0ZKN4                                   | ENSTGUG00000010818 <sup>c</sup>             |

**CODEML output for ML estimation of dN/dS for the mammalian tree.**

TREE # 1: (((((((((((((6, 8), 1), (5, 9)), (2, 3)), (4, 7)), (20, (18, 31))), 19), (23, 24)), 33), 26), (((((21, 22), 28), 34), 29), ((16, 17), (14, (12, (13, (15, (10, 11))))))), (25, 27)), 32, 30); MP score: 810

lnL(ntime: 65 np:130): -4872.649004 +0.000000

35..36 36..37 37..38 38..39 39..40 40..41 41..42 42..43 43..44 44..45 45..46  
46..47 47..6 47..8 46..1 45..48 48..5 48..9 44..49 49..2 49..3 43..50 50..4  
50..7 42..51 51..20 51..52 52..18 52..31 41..19 40..53 53..23 53..24 39..33  
38..26 37..54 54..55 55..56 56..57 57..58 58..21 58..22 57..28 56..34 55..29  
54..59 59..60 60..16 60..17 59..61 61..14 61..62 62..12 62..63 63..13 63..64  
64..15 64..65 65..10 65..11 36..66 66..25 66..27 35..32 35..30

0.584809 0.074657 0.042898 0.000004 0.010941 0.034051 0.060302 0.110256 0.000004  
0.013758 0.101162 0.000004 0.144838 0.007257 0.016031 0.090745 0.013375 0.019617  
0.089965 0.013714 0.068115 0.053076 0.047203 0.000004 0.016442 0.136696 0.205366  
0.072308 0.031778 0.294705 0.100081 0.271188 0.129317 0.429174 0.468055 0.000004  
0.070835 0.048026 0.023908 0.409510 0.122394 0.107222 0.310555 0.403000 0.167701  
0.000004 0.133405 0.153733 0.244236 0.133067 0.177681 0.062640 0.104159 0.040638  
0.023365 0.006463 0.019474 0.008152 0.036874 0.014403 0.045353 0.274313 0.174368  
0.316042 1.076215 0.030549 0.104180 0.082713 0.000100 999.000000 0.163035 0.048265  
0.151570 0.000100 999.000000 0.623015 0.000100 0.397076 0.000100 0.133631 0.152928  
0.183448 0.399032 0.358904 0.000100 0.265186 0.291258 0.137223 0.000100 0.137245  
0.056099 0.157465 0.041776 0.147009 0.037426 0.107210 0.033873 0.328011 0.152701  
0.034302 7.069095 0.086784 0.073461 999.000000 0.058117 0.078421 0.124204 0.053060  
0.041973 0.021899 0.000100 0.032308 0.101873 0.104325 0.081870 0.122353 0.039095  
0.014248 0.718144 0.000100 999.000000 0.096304 0.000100 0.000100 0.156876 0.255623  
0.103774 0.084310 0.048824 0.080762

Note: Branch length is defined as number of nucleotide substitutions per codon (not per nucleotide site).

tree length = 8.45964

((((((((((((((6: 0.144838, 8: 0.007257): 0.000004, 1: 0.016031): 0.101162, (5: 0.013375, 9: 0.019617): 0.090745): 0.013758, (2: 0.013714, 3: 0.068115): 0.089965): 0.000004, (4: 0.047203, 7: 0.000004): 0.053076): 0.110256, (20: 0.136696, (18: 0.072308, 31: 0.031778): 0.205366): 0.016442): 0.060302, 19: 0.294705): 0.034051, (23: 0.271188, 24: 0.129317): 0.100081): 0.010941, 33: 0.429174): 0.000004, 26: 0.468055): 0.042898, (((((21: 0.122394, 22: 0.107222): 0.409510, 28: 0.310555): 0.023908, 34: 0.403000): 0.048026, 29: 0.167701): 0.070835, ((16: 0.153733, 17: 0.244236): 0.133405, (14: 0.177681, (12: 0.104159, (13: 0.023365, (15: 0.019474, (10: 0.036874, 11: 0.014403): 0.008152): 0.006463): 0.040638): 0.062640): 0.133067): 0.000004): 0.000004): 0.074657, (25: 0.274313, 27: 0.174368): 0.045353): 0.584809, 32: 0.316042, 30: 1.076215);



((((((((((((P\_b\_whale: 0.144838, S\_b\_whale: 0.007257): 0.000004, L\_b\_whale: 0.016031): 0.101162, (M\_h\_whale: 0.013375, Dolphin: 0.019617): 0.090745): 0.013758, (S\_whale: 0.013714, P\_s\_whale: 0.068115): 0.089965): 0.000004, (M\_whale: 0.047203, Sei\_whale: 0.000004): 0.053076): 0.110256, (Pig: 0.136696, (Sheep: 0.072308, Cow: 0.031778): 0.205366): 0.016442): 0.060302, Horse: 0.294705): 0.034051, (Cat: 0.271188, Dog: 0.129317): 0.100081): 0.010941, Microbat: 0.429174): 0.000004, Hedgehog: 0.468055): 0.042898, (((((Rat: 0.122394, Mouse: 0.107222): 0.409510, K\_rat: 0.310555): 0.023908, Guinea\_pig: 0.403000): 0.048026, Tree\_shrew: 0.167701): 0.070835, ((Lemur: 0.153733, Galago: 0.244236): 0.133405, (Marmoset: 0.177681, (Macaque: 0.104159, (Gibbon: 0.023365, (Gorilla: 0.019474, (Human: 0.036874, Chimp: 0.014403): 0.008152): 0.006463): 0.040638): 0.062640): 0.133067): 0.000004): 0.000004): 0.074657, (Elephant: 0.274313, Hyrax: 0.174368): 0.045353): 0.584809, Platypus: 0.316042, Z\_finch: 1.076215);

#### Detailed output identifying parameters

w (dN/dS) for branches: 0.03055 0.10418 0.08271 0.00010 999.00000 0.16303 0.04826  
0.15157 0.00010 999.00000 0.62301 0.00010 0.39708 0.00010 0.13363 0.15293 0.18345  
0.39903 0.35890 0.00010 0.26519 0.29126 0.13722 0.00010 0.13725 0.05610 0.15746  
0.04178 0.14701 0.03743 0.10721 0.03387 0.32801 0.15270 0.03430 7.06910 0.08678  
0.07346 999.00000 0.05812 0.07842 0.12420 0.05306 0.04197 0.02190 0.00010 0.03231  
0.10187 0.10433 0.08187 0.12235 0.03909 0.01425 0.71814 0.00010 999.00000 0.09630  
0.00010 0.00010 0.15688 0.25562 0.10377 0.08431 0.04882 0.08076

**CODEML output for ML estimation of dN/dS for the whale clade of the mammalian tree.**

TREE # 1: (((((1, 8), (5, 9)), (2, 3)), (6, (4, 7))), 10); MP score: 110  
lnL(ntime: 17 np: 34): -1236.397819 +0.000000  
11..12 12..13 13..14 14..1 14..8 13..15 15..5 15..9 12..16 16..2 16..3 11..17  
17..6 17..18 18..4 18..7 11..10  
0.000004 0.015419 0.108174 0.020475 0.000004 0.080726 0.013206 0.019818 0.099070  
0.013827 0.068445 0.061192 0.000004 0.000004 0.040176 0.006770 0.338735 0.000100  
999.000000 0.468419 0.092380 0.000100 0.215621 0.181910 0.403131 0.253993 0.000100  
0.264662 0.239922 0.000100 0.000100 0.186734 0.000100 0.123082

Note: Branch length is defined as number of nucleotide substitutions per codon (not per nucleotide site).

tree length = 0.88605

(((1: 0.020475, 8: 0.000004): 0.108174, (5: 0.013206, 9: 0.019818): 0.080726): 0.015419,  
(2: 0.013827, 3: 0.068445): 0.099070): 0.000004, (6: 0.000004, (4: 0.040176, 7: 0.006770):  
0.000004): 0.061192, 10: 0.338735);

(((L\_b\_Whale: 0.020475, S\_b\_whale: 0.000004): 0.108174, (M\_h\_whale: 0.013206,  
Dolphin: 0.019818): 0.080726): 0.015419, (S\_whale: 0.013827, P\_s\_whale: 0.068445):  
0.099070): 0.000004, (P\_b\_whale: 0.000004, (M\_whale: 0.040176, Sei\_whale: 0.006770):  
0.000004): 0.061192, Human: 0.338735);

Detailed output identifying parameters

w (dN/dS) for branches: 0.00010 999.00000 0.46842 0.09238 0.00010 0.21562 0.18191  
0.40313 0.25399 0.00010 0.26466 0.23992 0.00010 0.00010 0.18673 0.00010 0.12308

**CODEML output for ML estimation of dN/dS for the terrestrial clade of the mammalian tree.**

TREE # 1: (((((((((22, 9), 11), 10), (14, 15)), 24), 17), (((((13, 12), 19), 25), 20), ((8, 7), (5, (3, (4, (6, (2, 1))))))))), (16, 18)), 23, 21); MP score: 698

lnL(ntime: 0 np: 48): -4469.293861 +0.000000

2.132874 0.205803 0.177989 0.027162 0.000100 0.244110 0.023127 0.069289 0.239596  
0.117675 0.052670 0.033534 0.098425 0.101625 0.071061 0.267009 0.295372 0.054535  
0.176578 0.157013 0.107313 0.246148 0.090720 0.094597 0.141986 0.106614 0.065221  
0.036812 0.000100 0.064889 0.117602 0.199427 0.134152 0.154916 0.035965 0.021182  
0.414814 0.000100 999.000000 0.103703 0.000100 0.177970 0.000100 0.117072 0.130268  
0.097307 0.055631 0.125422

tree length = 2.89227

((((((((22: 0.014664, 9: 0.024835): 0.107857, 11: 0.033307): 0.024740, 10: 0.096967):  
0.022258, (14: 0.061968, 15: 0.071931): 0.125947): 0.013695, 24: 0.159251): 0.020547, 17:  
0.104168): 0.032203, (((((13: 0.059425, 12: 0.029436): 0.162509, 19: 0.077621): 0.017955,  
25: 0.128501): 0.017460, 20: 0.044689): 0.011044, ((8: 0.125528, 7: 0.027376): 0.024531,  
(5: 0.079872, (3: 0.031680, (4: 0.006093, (6: 0.007188, (2: 0.006173, 1: 0.011604):  
0.002617): 0.004348): 0.019334): 0.016000): 0.024475): 0.014916): 0.018029): 0.038019,  
(16: 0.112693, 18: 0.069882): 0.047069): 0.024887, 23: 0.161489, 21: 0.555492);

((((((((Cow: 0.014664, Sheep: 0.024835): 0.107857, Pig: 0.033307): 0.024740, Horse:  
0.096967): 0.022258, (Cat: 0.061968, Dog: 0.071931): 0.125947): 0.013695, Microbat:  
0.159251): 0.020547, Hedgehog: 0.104168): 0.032203, (((((Mouse: 0.059425, Rat:  
0.029436): 0.162509, K\_rat: 0.077621): 0.017955, Guinea\_pig: 0.128501): 0.017460,  
Tree\_shrew: 0.044689): 0.011044, ((Galago: 0.125528, Lemur: 0.027376): 0.024531,  
(Marmoset: 0.079872, (Macaque: 0.031680, (Gibbon: 0.006093, (Gorilla: 0.007188, (Chimp:  
0.006173, Human: 0.011604): 0.002617): 0.004348): 0.019334): 0.016000): 0.024475):  
0.014916): 0.018029): 0.038019, (Elephant: 0.112693, Hyrax: 0.069882): 0.047069):  
0.024887, Platypus: 0.161489, Z\_finch: 0.555492);

Detailed output identifying parameters

kappa (ts/tv) = 2.13287

w (dN/dS) for branches: 0.20580 0.17799 0.02716 0.00010 0.24411 0.02313 0.06929  
0.23960 0.11767 0.05267 0.03353 0.09843 0.10162 0.07106 0.26701 0.29537 0.05454  
0.17658 0.15701 0.10731 0.24615 0.09072 0.09460 0.14199 0.10661 0.06522 0.03681  
0.00010 0.06489 0.11760 0.19943 0.13415 0.15492 0.03597 0.02118 0.41481 0.00010  
999.00000 0.10370 0.00010 0.17797 0.00010 0.11707 0.13027 0.09731 0.05563 0.12542

**NetPhos 2.0 prediction results.**

154 L\_b\_Whale  
MGLSEAEWQLVLHVWAKVEADLSGHGQEILIRLFKGGHPETLEKFDKFKHLKSEAEMKASEDLKKHGH  
TVLTALGGILKKK 80  
GHHEAELKPLAQSHATKHKIPIKYLEFISDAIIHVLHSHKPSDFGADAQAAMTKALELFRKDIAAKYKEL  
GFHG 160  
.....S.....S..... 80  
.....S..... 160

Phosphorylation sites predicted: Ser: 3 Thr: 0 Tyr: 0

Serine predictions

| Name      | Pos | Context   | Score | Pred |
|-----------|-----|-----------|-------|------|
| v         |     |           |       |      |
| L_b_Whale | 4   | -MGLSEAEW | 0.008 | .    |
| L_b_Whale | 23  | EADLSGHGQ | 0.829 | *S*  |
| L_b_Whale | 52  | KHLKSEAEM | 0.975 | *S*  |
| L_b_Whale | 59  | EMKASEDLK | 0.047 | .    |
| L_b_Whale | 93  | PLAQSHATK | 0.018 | .    |
| L_b_Whale | 109 | LEFISDAI  | 0.003 | .    |
| L_b_Whale | 118 | HVLHSHKPS | 0.973 | *S*  |
| L_b_Whale | 122 | SKHPSDFGA | 0.249 | .    |
| ^         |     |           |       |      |

Threonine predictions

| Name      | Pos | Context   | Score | Pred |
|-----------|-----|-----------|-------|------|
| v         |     |           |       |      |
| L_b_Whale | 40  | GHPETLEKF | 0.361 | .    |
| L_b_Whale | 68  | KHGHTVLTA | 0.013 | .    |
| L_b_Whale | 71  | HTVLTALGG | 0.141 | .    |
| L_b_Whale | 96  | QSHATKHKI | 0.076 | .    |
| L_b_Whale | 133 | QAAMTKALE | 0.296 | .    |
| ^         |     |           |       |      |

Tyrosine predictions

| Name      | Pos | Context   | Score | Pred |
|-----------|-----|-----------|-------|------|
| v         |     |           |       |      |
| L_b_Whale | 104 | IPIKYLEFI | 0.025 | .    |
| L_b_Whale | 147 | IAAKYKELG | 0.467 | .    |
| ^         |     |           |       |      |

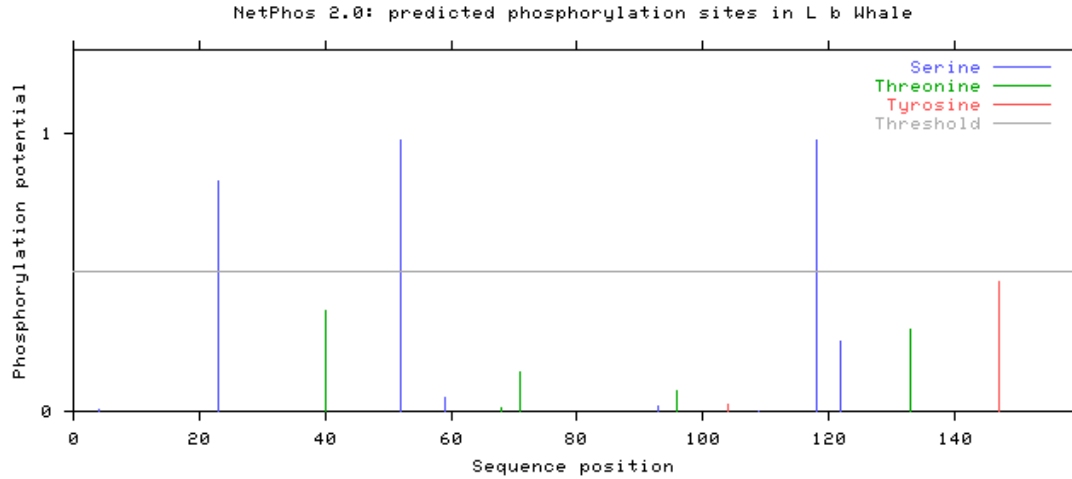

154 S\_b\_whale  
MGLSEAEWQLVLHVWAKVEADLSGHGQEIILIRLFKGHPELEKFDKFKHLKSEAEMKASEDLKKGHG  
TVLTALGGILKKK 80  
GHHEAELKPLAQSHATKHKIPIKYLEFISDAIIVLHSHKPSDFGADAQGAMTKALELFRKDIAAKYKEL  
GFHG 160  
.....S.....S..... 80  
.....S..... 160

Phosphorylation sites predicted: Ser: 3 Thr: 0 Tyr: 0

Serine predictions

| Name      | Pos | Context   | Score | Pred |
|-----------|-----|-----------|-------|------|
| S_b_whale | 4   | -MGLSEAEW | 0.008 | .    |
| S_b_whale | 23  | EADLSGHGQ | 0.829 | *S*  |
| S_b_whale | 52  | KHLKSEAEM | 0.975 | *S*  |
| S_b_whale | 59  | EMKASEDLK | 0.047 | .    |
| S_b_whale | 93  | PLAQSHATK | 0.018 | .    |
| S_b_whale | 109 | LEFISDAI  | 0.003 | .    |
| S_b_whale | 118 | HVLHSHKPS | 0.973 | *S*  |
| S_b_whale | 122 | SKHPSDFGA | 0.249 | .    |

Threonine predictions

| Name      | Pos | Context    | Score | Pred |
|-----------|-----|------------|-------|------|
| S_b_whale | 40  | GHPETLEKF  | 0.361 | .    |
| S_b_whale | 68  | KHGHTVLTA  | 0.013 | .    |
| S_b_whale | 71  | HTVLTAALGG | 0.141 | .    |
| S_b_whale | 96  | QSHATKHKI  | 0.076 | .    |
| S_b_whale | 133 | QGAMTKALE  | 0.296 | .    |

Tyrosine predictions

| Name      | Pos | Context   | Score | Pred |
|-----------|-----|-----------|-------|------|
| S_b_whale | 104 | IPIKYLEFI | 0.025 | .    |
| S_b_whale | 147 | IAAKYKELG | 0.467 | .    |

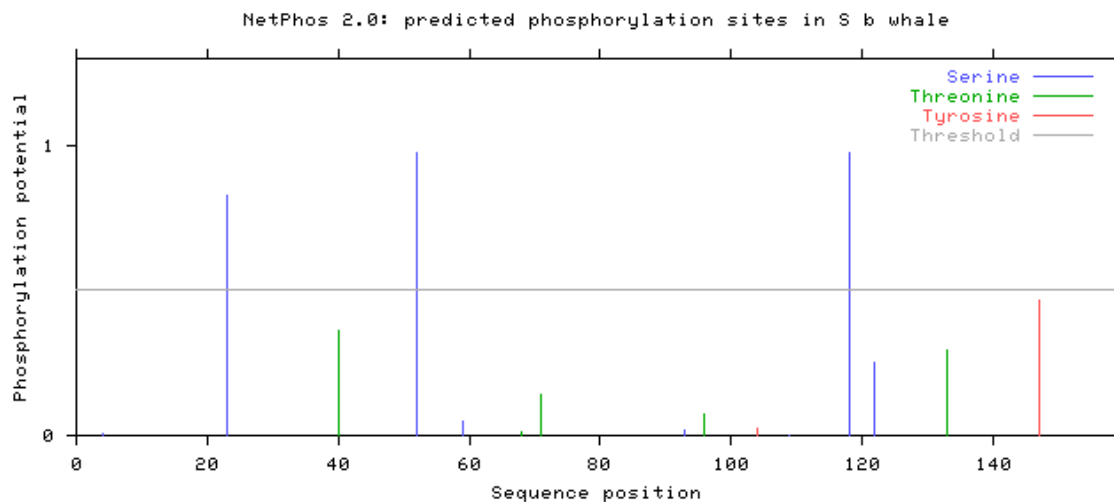

## References

- <sup>1</sup> Phillips SEV (1980) Structure and refinement of oxymyoglobin at 1.6 Å resolutions. *J Mol Biol* 142: 531-554.
- <sup>2</sup> Kondrashov DA, Zhang W, Aranda IV R, Stec B, Phillips GN (2008) Sampling of the native conformational ensemble of myoglobin via structures in different crystalline environments. *Proteins Struct Funct Bioinf* 70:353–362.
- <sup>3</sup> Nishimura C, Wright PE, Dyson HJ (2003) Role of the B helix in early folding events in apomyoglobin: evidence from site-directed mutagenesis for native-like long range interactions. *J Mol Biol* 334: 293–307.
- <sup>4</sup> Hughson FM, Barrick D, Baldwin RL (1991) Probing the stability of a partly folded apomyoglobin intermediate by site-directed mutagenesis. *Biochemistry* 30: 4113-41 18.
- <sup>5</sup> Barrick D, Hughson FM, Baldwin RL (1994) Molecular mechanisms of acid denaturation. The role of histidine residues in the partial unfolding of apomyoglobin. *J Mol Biol* 237:588–601.
- <sup>6</sup> UniProt Consortium (2011) Ongoing and future developments at the Universal Protein Resource. *Nucleic Acids Res* 39, D214–D219.
- <sup>7</sup> Kanz C, Aldebert P, Althorpe N, Baker W, Baldwin A et al. (2005) The EMBL Nucleotide Sequence Database. *Nucleic Acids Res.* 33:D29–D33.
- <sup>8</sup> Hubbard TJ, Aken BL, Ayling S, Ballester B, Beal K ET AL. (2009) Ensembl 2009, *Nucleic Acids Res.* 2009; 37:D690–D697.
